# Supplementary material for: Forward Modeling Reveals Multidecadal Trends in Cambial Kinetics and Phenology at Treeline
Source: Frontiers journal article supplement (doi:10.3389/fpls.2021.613643), 2021-01-28
Supplement: Image_1.PDF [file Image_1.PDF]

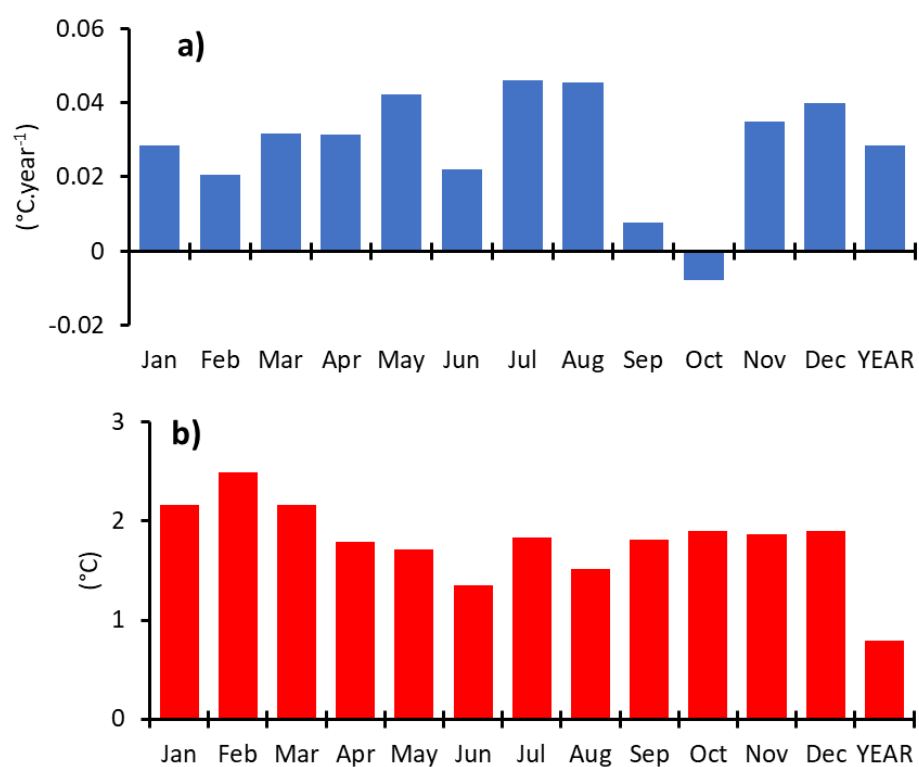

**Figure S1:** Slopes of linear trends (a) and standard deviations (b) in monthly and annual mean temperatures over period 1961-2017
