# Supplementary material for: Forward Modeling Reveals Multidecadal Trends in Cambial Kinetics and Phenology at Treeline
Source: Frontiers journal article supplement (doi:10.3389/fpls.2021.613643), 2021-01-28
Supplement: Image_3.PDF [file Image_3.PDF]

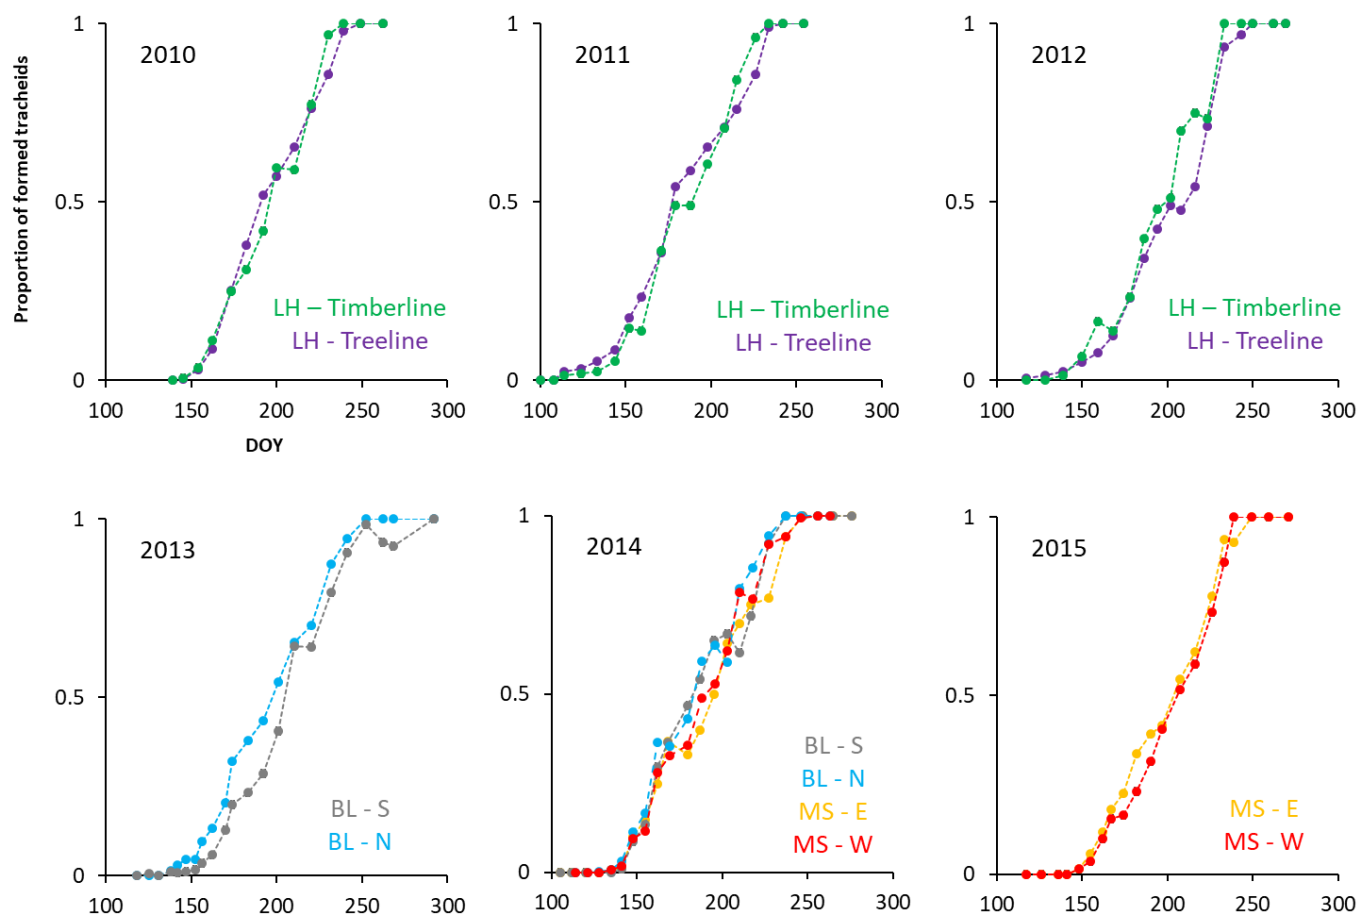

**Figure S3:** Comparison of cambial kinetics between individual sampling microsites. Graphs show the increasing proportion of differentiating tracheids (enlarging+wall-thickening+mature) for individual sampling dates standardized by the final number of cells formed at the end of the calendar year. Differences between microsites are non-significant for all sampling dates (n=165)
