# Supplementary material for: Forward Modeling Reveals Multidecadal Trends in Cambial Kinetics and Phenology at Treeline
Source: Frontiers journal article supplement (doi:10.3389/fpls.2021.613643), 2021-01-28
Supplement: Image_4.PDF [file Image_4.PDF]

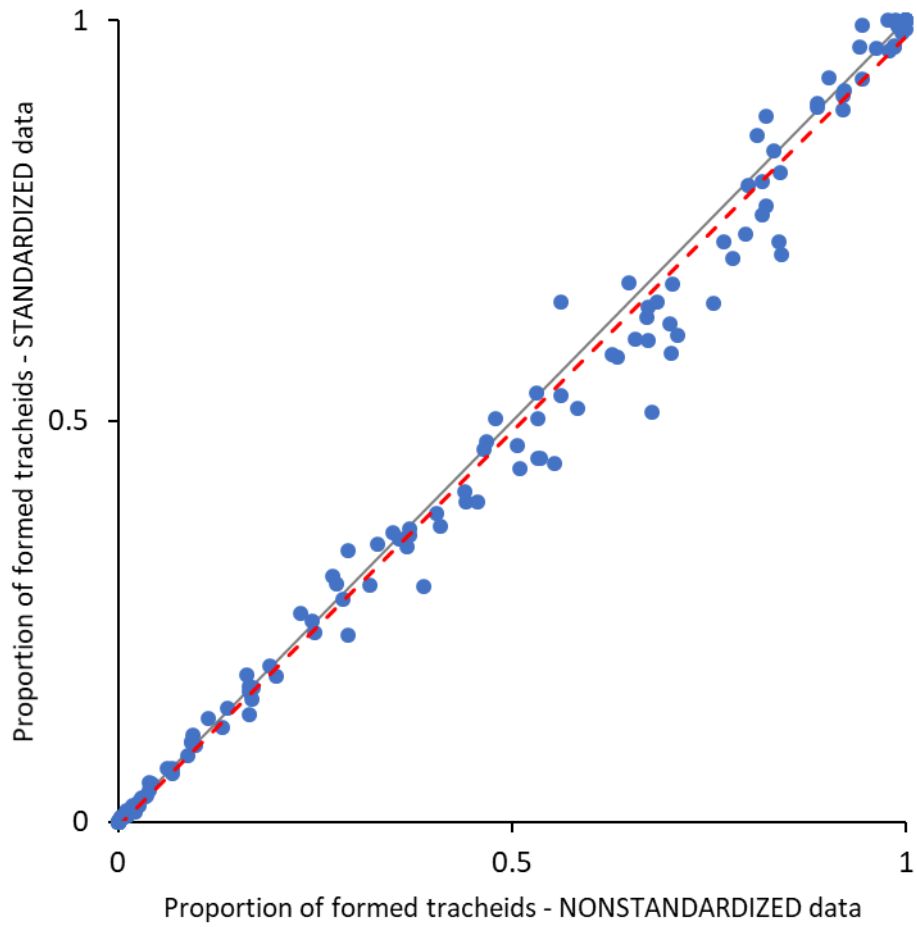

**Figure S4:** Relationship between proportion of tracheids in enlarging, wall-thickening and mature phases formed during individual dates of xylogenesis monitoring based on standardized and nonstandardized data. Red dashed line represents least-square regression.
