# Supplementary material for: Forward Modeling Reveals Multidecadal Trends in Cambial Kinetics and Phenology at Treeline
Source: Frontiers journal article supplement (doi:10.3389/fpls.2021.613643), 2021-01-28
Supplement: Image_5.PDF [file Image_5.PDF]

## Standard chronology

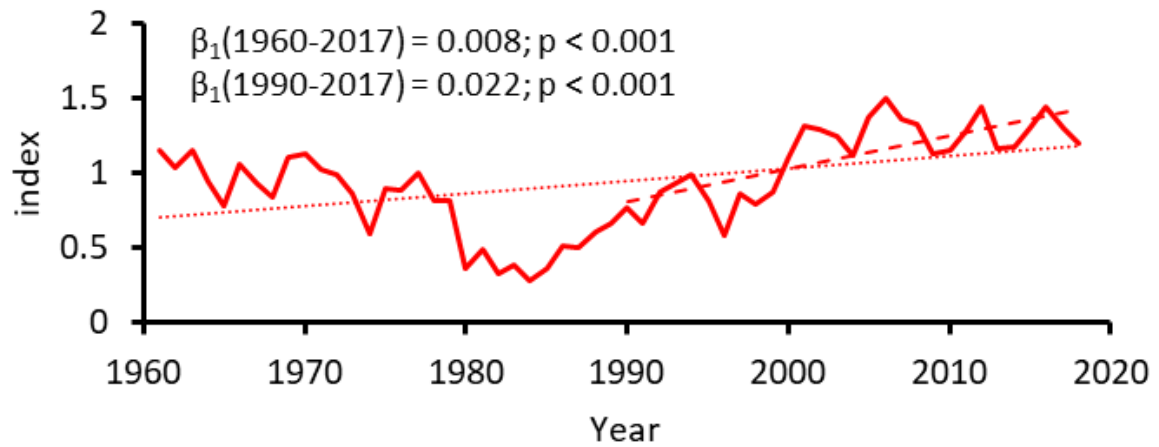

## Residual chronology

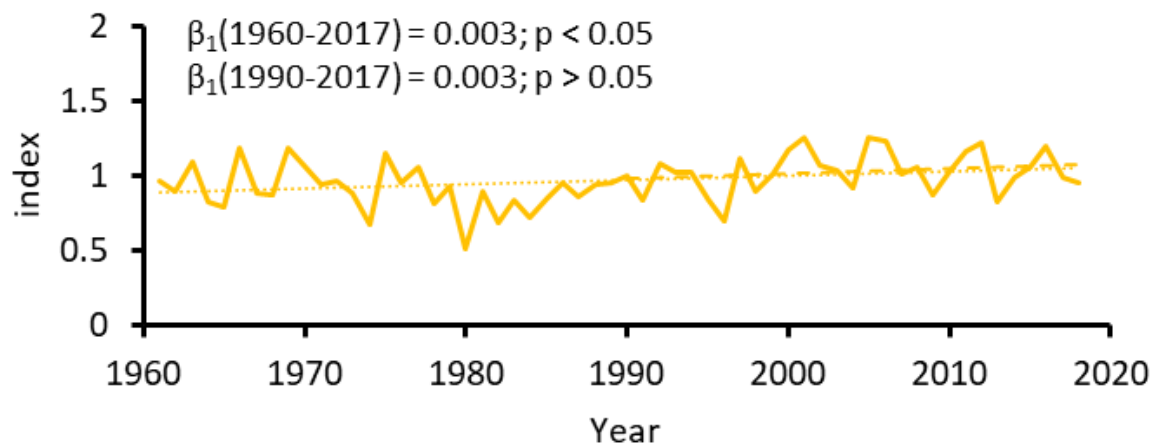

**Figure S5:** Multidecadal trends in site chronologies. Lines represent least-square regression for period 1960-2017 (dotted) and 1990-2017 (dashed).  $\beta_1$  indicates slopes of those regressions
